# Supplementary figures and images for: Improved bacterial RNA-seq by Cas9-based depletion of ribosomal RNA reads
Source: PubMed Central journal article supplement — RNA. 2020 Aug;26(8):1069–78. doi: 10.1261/rna.075945.120 (PMC7373992; doi:10.1261/rna.075945.120), 2020-08

# Figure S1

A)

35,000:3,500 sgRNA:Cas9, RPKM > 1

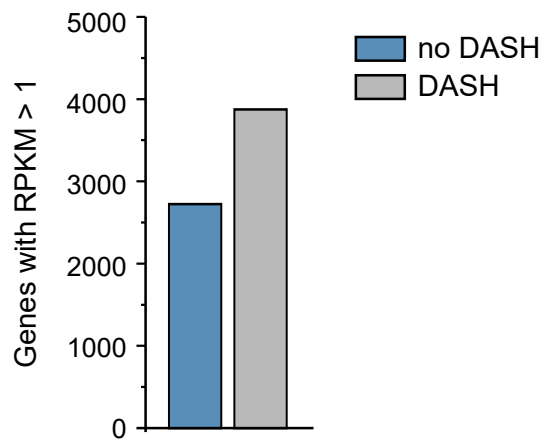

B)

1,000:100 sgRNA:Cas9, RPKM > 1

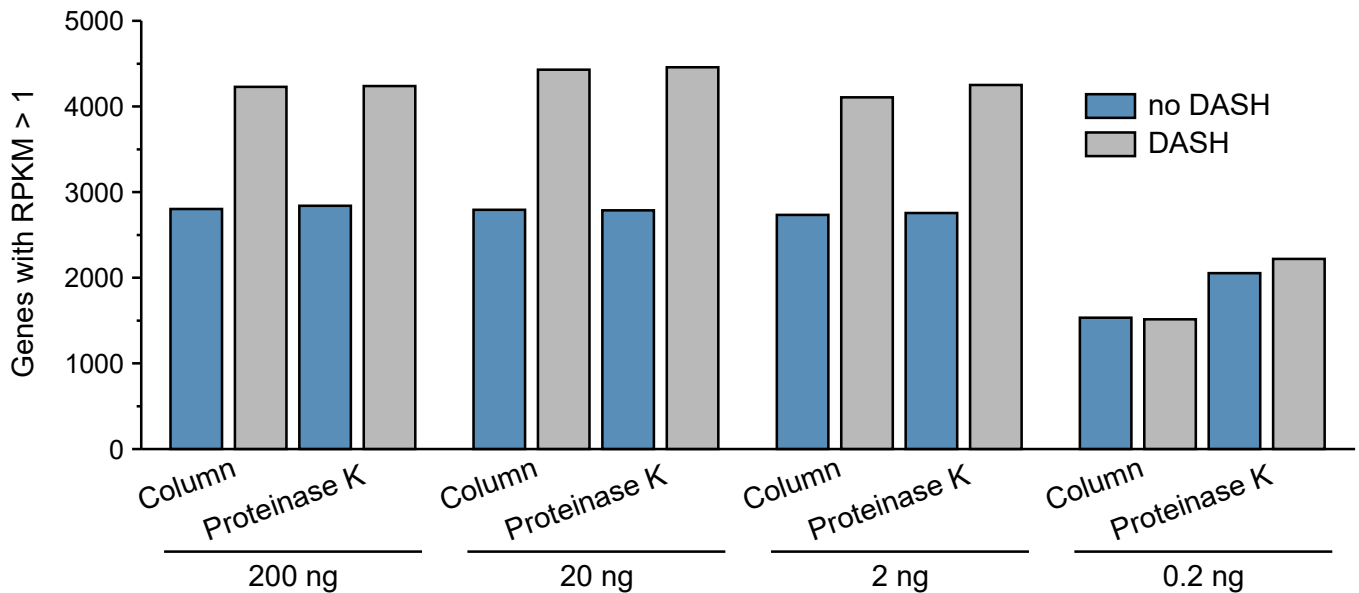

1,000:100 sgRNA:Cas9, RPKM > 25

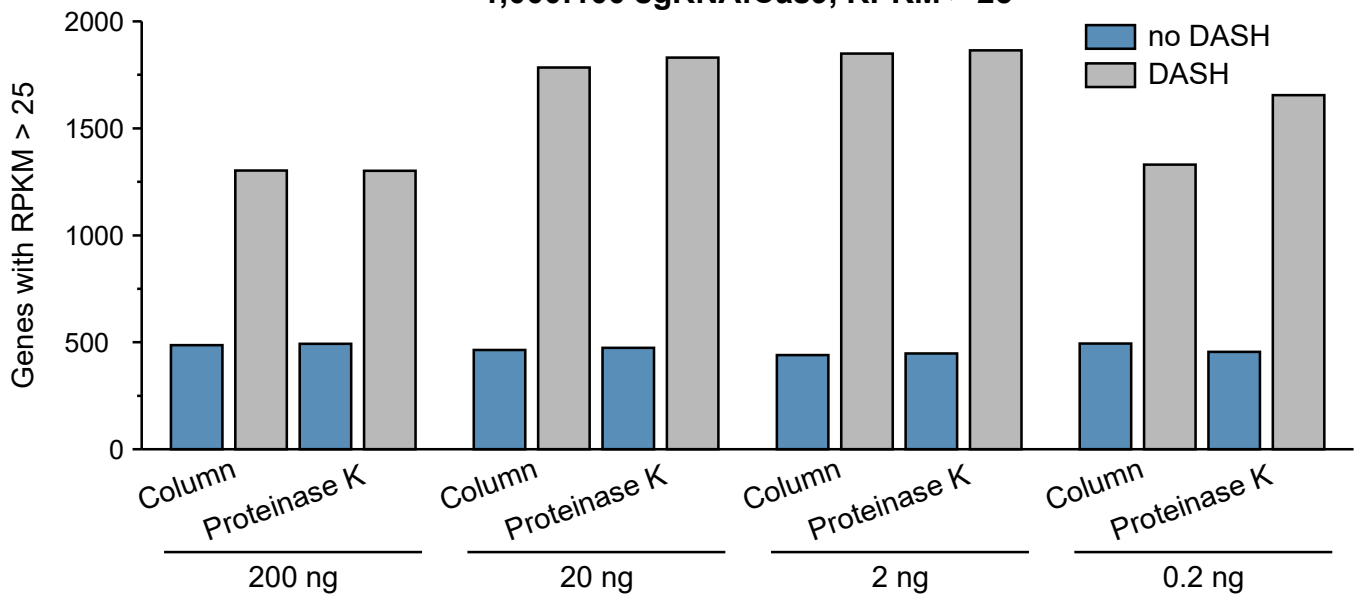

Supplement: supp_075945.120_Supplemental_Figure_S1.pdf [file supp_075945.120_Supplemental_Figure_S1.pdf]

# Figure S2

A)

*Salmonella*, 35,000:3,500 sgRNA:Cas9

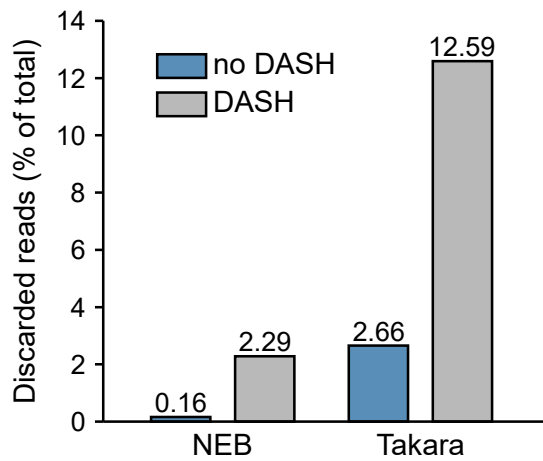

B)

*Bacteroides*, 35,000:3,500 sgRNA:Cas9

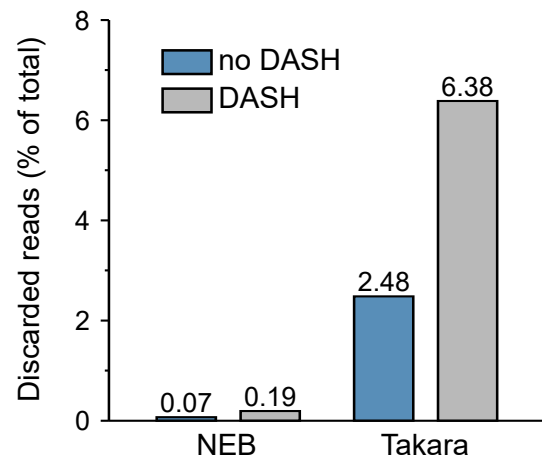

Supplement: supp_075945.120_Supplemental_Figure_S2.pdf [file supp_075945.120_Supplemental_Figure_S2.pdf]
